# Supplementary material for: Rapid genotyping of tilapia lake virus (TiLV) using Nanopore sequencing
Source: bioRxiv or medRxiv preprint supplement (doi:10.1101/2021.03.29.437503), 2021-05-28

**A**

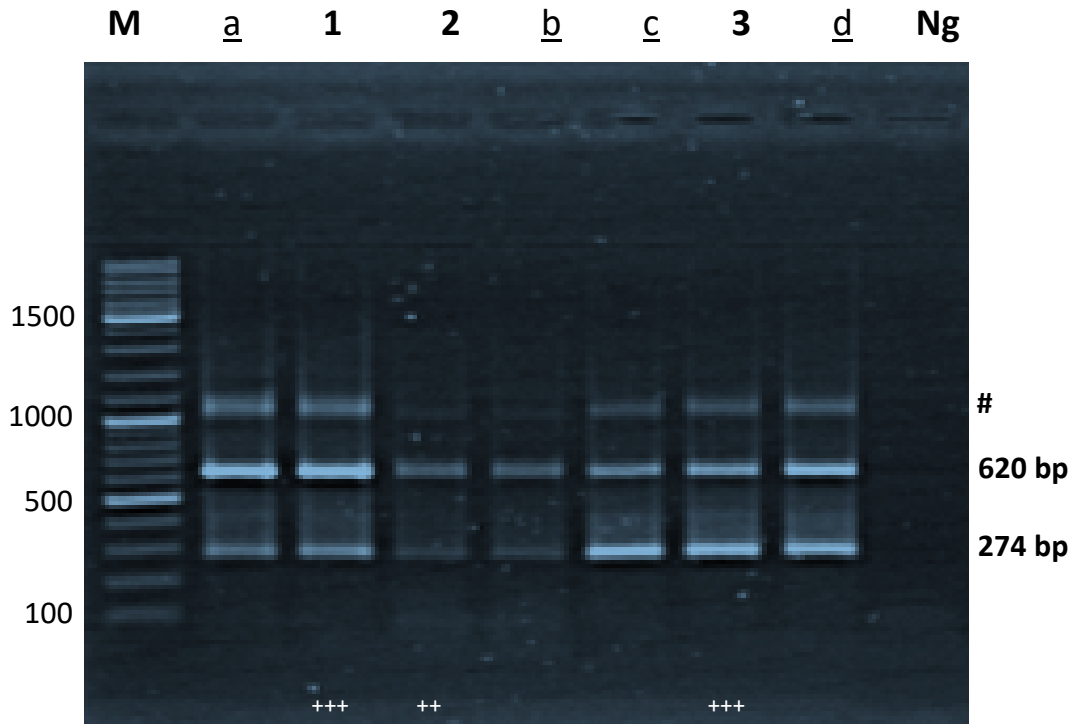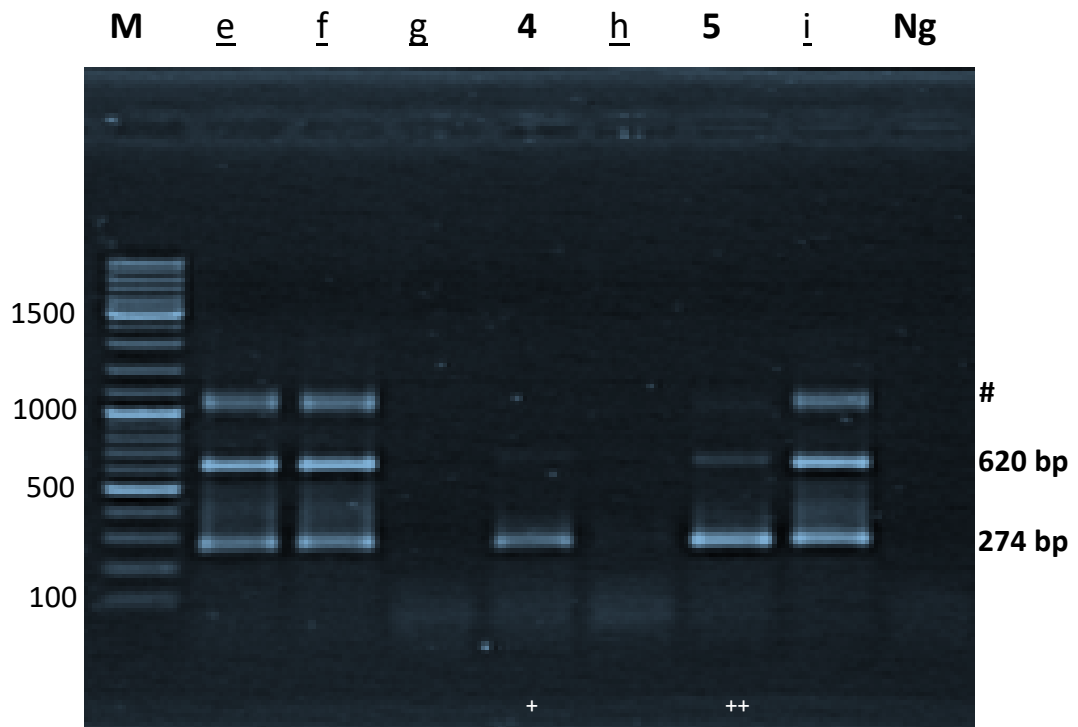

**B**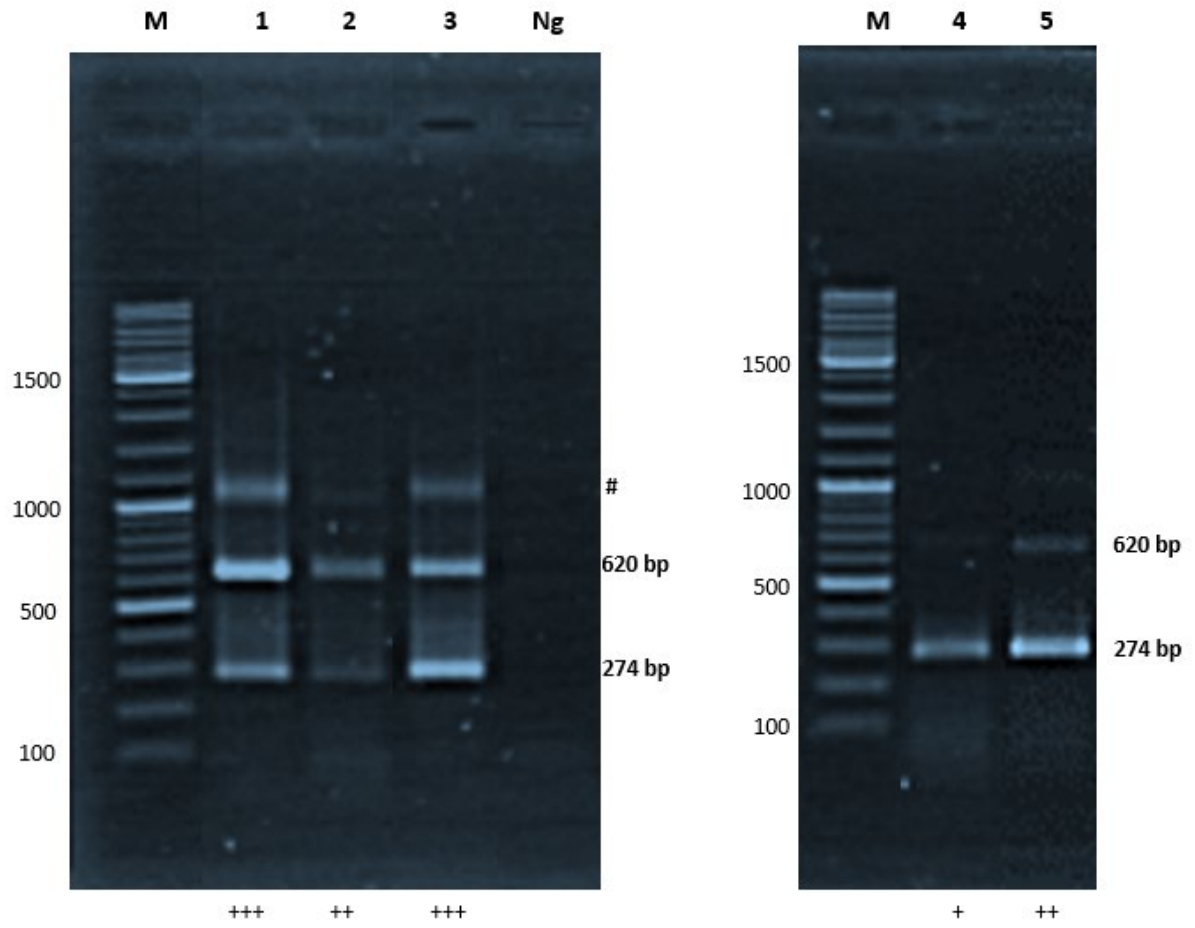

Supplement: Supplementary file [file media-1.pdf]
